# Supplementary material
Source: bioRxiv or medRxiv preprint supplement (https://www.biorxiv.org/highwire/filestream/8807/field_highwire_adjunct_files/0/032979-1.pdf)

A

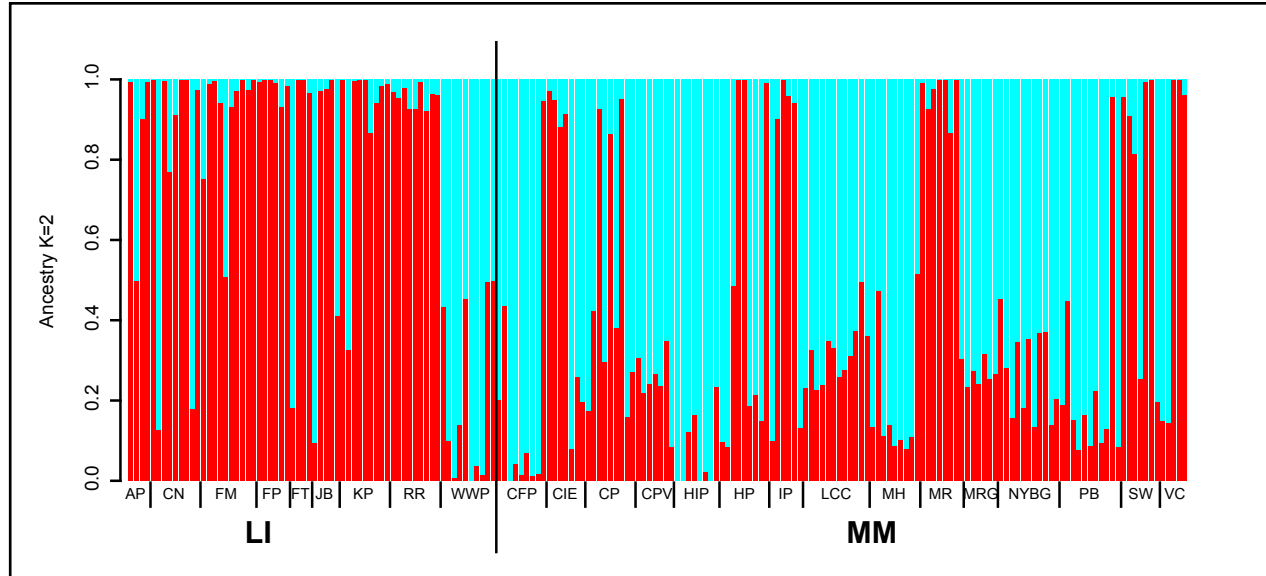

B

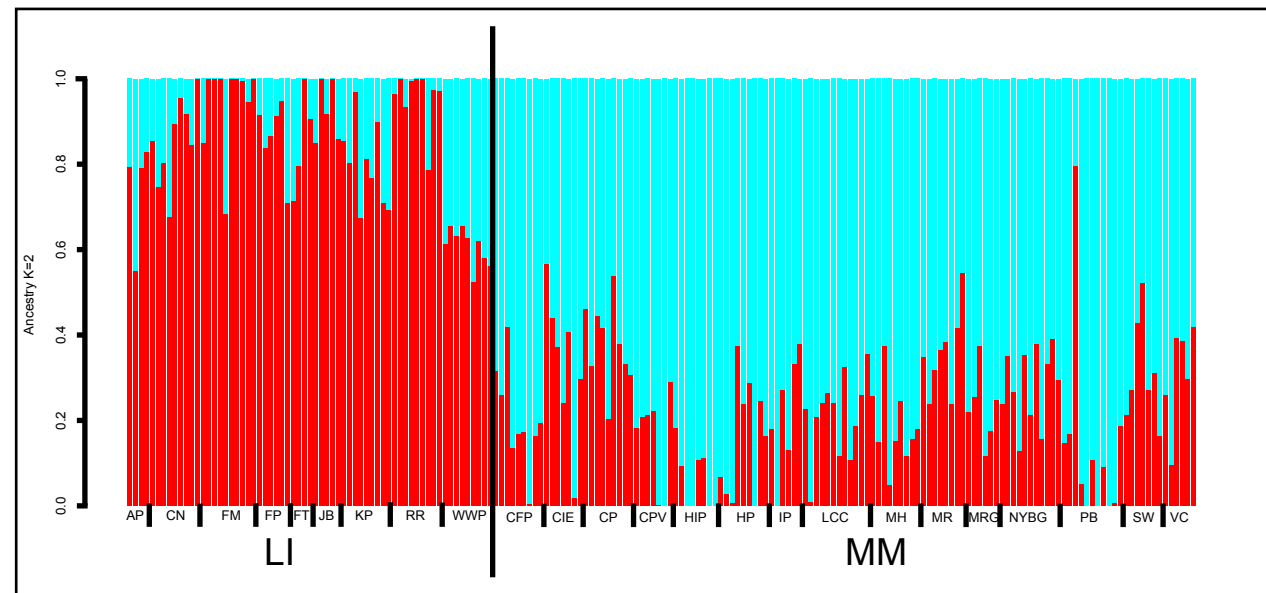

Supplement: Supplementary file [file 032979-1.pdf]
